# Supplementary material for: Application of Near Infrared Spectroscopy for the Rapid Assessment of Nutritional Quality of Different Strawberry Cultivars
Source: MDPI journal article supplement (doi:10.3390/foods12173253), 2023-08-29
Supplement: s1 [file s1]

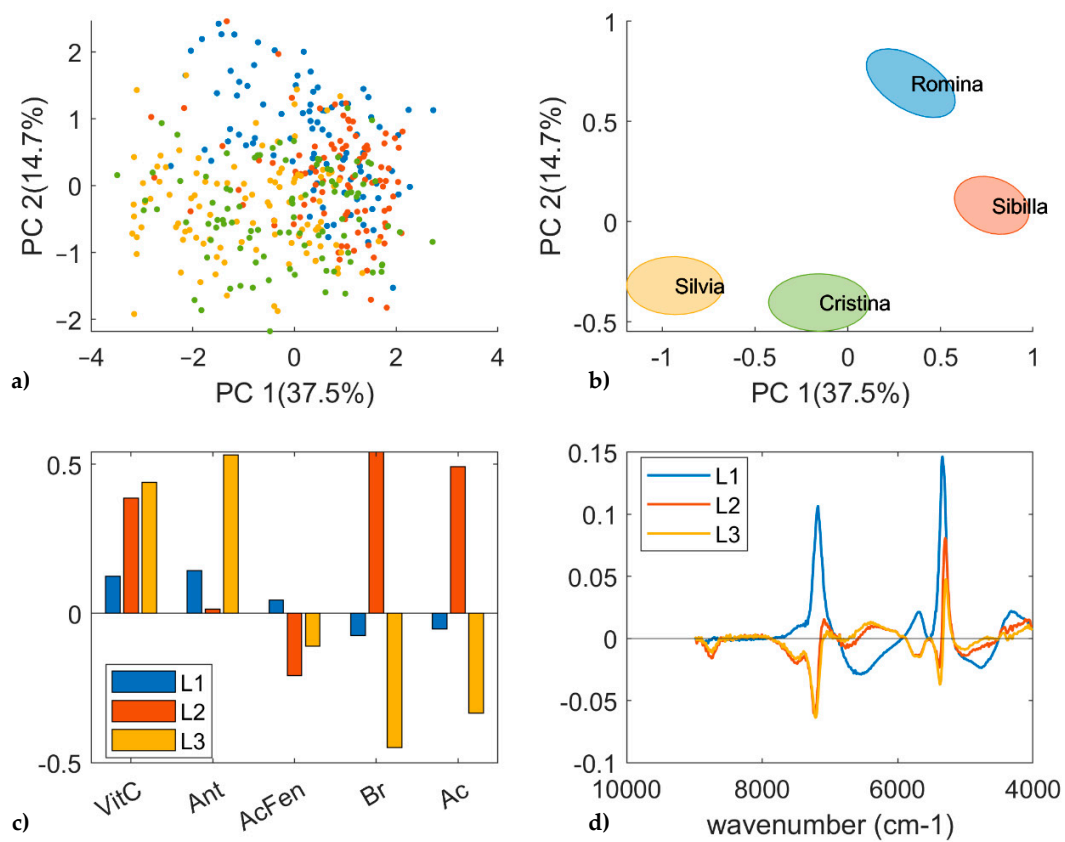

**Figure S1:** PCA score plot of PC1 vs PC2 computed on D-fused dataset with low-level approach (a) and with standard error ellipses for each cultivar (b). PCA loading plot of the three first PCs for D-Lab dataset (c) and D-NIR dataset (d).
